# Supplementary material for: Priming of Defense Systems and Upregulation of MYC2 and JAZ1 Genes after Botrytis cinerea Inoculation in Methyl Jasmonate-Treated Strawberry Fruits
Source: PubMed Central journal article supplement (PMC7238239; doi:10.3390/plants9040447), 2020-04-02
Supplement: plants-09-00447-s001.pdf [file plants-09-00447-s001.pdf]

**Supplementary Material**
**Valenzuela-Riffo, Zúñiga et al.**

**Table 1.** Incidence (%) of *Penicillium* sp., *Rhizopus* sp., and *Cladosporium* sp. in control (C)-, and methyl jasmonate (MeJA)-treated strawberry (*Fragaria × ananassa* ‘Camarosa’) fruits (M1, M2, M3 treatments) inoculated with water (–Bc) at 72 h of postharvest storage. For experimental details see the Materials and Methods section.

| Treatment           | Incidence (%)          |                     |                         |
|---------------------|------------------------|---------------------|-------------------------|
|                     | <i>Penicillium</i> sp. | <i>Rhizopus</i> sp. | <i>Cladosporium</i> sp. |
| C                   | 16.7 a <sup>1</sup>    | 72.2 ± 7.9          | 0                       |
| M1                  | 0 b                    | 83.3 ± 13.6         | 11.1 ± 15.7             |
| M2                  | 0 b                    | 77.8 ± 20.8         | 0                       |
| M3                  | 0 b                    | 88.9 ± 7.9          | 11.1 ± 7.9              |
| <i>Significance</i> | <0.001                 | n.s. <sup>2</sup>   | n.s.                    |

<sup>1</sup> Different letters in the same column indicate significant differences between treatments (Fisher’s test,  $p \leq 0.05$ ). <sup>2</sup> Non-significant according to Fisher’s test,  $p \leq 0.05$ .

**Table 2.** Primers sequences (5'→3') used for quantitative reverse transcription PCR (RT-qPCR) analysis performed in the present research.

| Target Gene     | Primer Forward/Reverse                                                 | Reference                     |
|-----------------|------------------------------------------------------------------------|-------------------------------|
| <i>FaOPR3</i>   | 5'- TCCACGGGACTCACCTGTCTCTC -3'<br>5'- TCGTTCAACGCTCGACACCTCGTC -3'    | Garrido-Bigotes et al., 2018a |
| <i>FaMYC2</i>   | 5'- AGGGGATCCTGTCGTTTACC -3'<br>5'- TTCGGGGTCCACAACCTCTAC -3'          | Garrido-Bigotes et al., 2018b |
| <i>FaJAZ1</i>   | 5'- TGGGAGATCTGAACTCTGCTC -3'<br>5'- TTCCTCGGTTTCTCCATCAC -3'          | Garrido-Bigotes et al., 2018b |
| <i>FaCHI2-2</i> | 5'- GCACAACAGGTGATGTTGC -3'<br>5'- GTAATGACGTCGTGGCTTGA -3'            | Saavedra et al., 2017         |
| <i>FaCHI3-1</i> | 5'- AGGTCTTCTTAGGCTCCCTGCGGC -3'<br>5'- CTTGGACCAAAGCATGACACCGCC -3'   | Saavedra et al., 2017         |
| <i>FaBG2-1</i>  | 5'- CTAATATCTTCTTCTCCTGCCATA -3'<br>5'- AATGTTGTATCTATTGCTGTTG -3'     | Saavedra et al., 2017         |
| <i>FaBG2-2</i>  | 5'- ACCGGGACTCCCAAGAGACCAAATG -3'<br>5'- TGTGAGCCTGCACTAGCCAAAGGTG -3' | Saavedra et al., 2017         |
| <i>FaBG2-3</i>  | 5'- TCCGAGAGTGGTTGGCCATCTGAAG -3'<br>5'- TCCATTTGGTCTCTTCGGAGTCCCG -3' | Saavedra et al., 2017         |
| <i>FaPGIP1</i>  | 5'- TGCTATAATTCCGATCTGTCCAAGG -3'<br>5'- ATTATCCAATTGGGTCAACTGCTC -3'  | Saavedra et al., 2017         |
| <i>FaPGIP2</i>  | 5'- TCCTCATGAAAATCCGACGCCGAC -3'<br>5'- ACCCTGTGAGATTGGGGAGCTTGCG -3'  | Saavedra et al., 2017         |
| <i>FaPAL</i>    | 5'- CAAGGGCGCGCATGCTAGTAAG -3'<br>5'- CCAAGTCACCCGACGACGAGAT -3'       | Concha et al., 2013           |
| <i>FaPOD27</i>  | 5'- ATTTCCATGATTGCTTTGTCAG -3'<br>5'- CAACGGCTAAGATGTCAGACC -3'        | Concha et al., 2013           |
| <i>FaUFGT</i>   | 5'- ATCGTGGCTTGACAAAACAGAA -3'<br>5'- TGACCACAAGAATGGAACCTA -3'        | Delgado et al., 2018          |
| <i>FaANR</i>    | 5'- GCTATCAGGTTCCATATCCATTACAC -3'<br>5'- TGAGCTCGGCAGACATCCT -3'      | Delgado et al., 2018          |
| <i>FaGAPDH</i>  | 5'- TTCATCACTACTGCCACCCAGAAGACTG -3'<br>5'- AGCAGGCAGAACCTTCCGACAG -3' | Garrido-Bigotes et al., 2018a |

## References

- Concha, C. M., Figueroa, N. E., Poblete, L. A., Oñate, F. A., Schwab, W., & Figueroa, C. R. (2013). Methyl jasmonate treatment induces changes in fruit ripening by modifying the expression of several ripening genes in *Fragaria chiloensis* fruit. *Plant Physiol. Biochem.* 70, 433–444. <https://doi.org/10.1016/j.plaphy.2013.06.008>
- Delgado, L., Zúñiga, P., Figueroa, N., Pastene, E., Escobar-Sepúlveda, H., Figueroa, P., Garrido-Bigotes, A., Figueroa, C.R. (2018). Application of a JA-Ile Biosynthesis Inhibitor to Methyl Jasmonate-Treated Strawberry Fruit Induces Upregulation of Specific MBW Complex-Related Genes and Accumulation of Proanthocyanidins. *Molecules* 23, 1433. <https://doi.org/10.3390/molecules23061433>
- Garrido-Bigotes, A., Figueroa, P. M., & Figueroa, C. R. (2018a). Jasmonate Metabolism and Its Relationship with Abscisic Acid During Strawberry Fruit Development and Ripening. *J. Plant Growth Regul.* 37, 101-13. <https://doi.org/10.1007/s00344-017-9710-x>
- Garrido-Bigotes, A., Figueroa, N. E., Figueroa, P. M., & Figueroa, C. R. (2018b). Jasmonate signalling pathway in strawberry: Genome-wide identification, molecular characterization and expression of JAZs and MYCs during fruit development and ripening. *Plos One.* 13, e0197118. <https://doi.org/10.1371/journal.pone.0197118>
- Saavedra, G. M., Sanfuentes, E., Figueroa, P. M., & Figueroa, C. R. (2017). Independent Preharvest Applications of Methyl Jasmonate and Chitosan Elicit Differential Upregulation of Defense-Related Genes with Reduced Incidence of Gray Mold Decay during Postharvest Storage of *Fragaria chiloensis* Fruit. *Int. J. Mol. Sci.* 18, 1420. <https://doi.org/10.3390/ijms18071420>
